# Supplementary material for: Hydrophobically modified mesoporous silica supported Pt as a dual-function adsorbent buffer-catalyst for toluene removal under low-temperature
Source: Royal Society of Chemistry journal article supplement (doi:10.1039/d2nj04768c), 2022-12-22
Supplement: d2nj04768c1.pdf [file d2nj04768c1.pdf]

1 Supporting Information

2

3 **Hydrophobically modified mesoporous silica supported Pt as a dual-function of**  
4 **adsorbent buffer-catalysis for toluene removal under low-temperature**

5

6 Mu Zhou <sup>a,b</sup>, Shuangde Li<sup>b\*</sup>, Shaohua Chai <sup>b,c</sup>, Tao Wang <sup>b,d</sup>, Linfeng Nie <sup>b</sup>,

7

Yunfa Chen <sup>b,c\*</sup>

8

*<sup>a</sup> Beijing Institute of Petrochemical Technology, Beijing 102617, PR China*

9

*<sup>b</sup> State Key Laboratory of Multiphase Complex Systems, Institute of Process*

10

*Engineering, Chinese Academy of Sciences, Beijing 100190, PR China*

11

*<sup>c</sup> College of Materials Science and Opto-Electronic Technology, University of*

12

*Chinese Academy of Sciences, Beijing 100049, PR China*

13

*<sup>d</sup> College of Chemical Engineering, Nanjing Tech University, Nanjing 211816, PR*

14

*China*

15

16

17

**\*Author to whom correspondence should be addressed**

18

Shuangde Li, email: [sdli@ipe.ac.cn](mailto:sdli@ipe.ac.cn)

19

Yunfa Chen, email: [chenyf@ipe.ac.cn](mailto:chenyf@ipe.ac.cn)

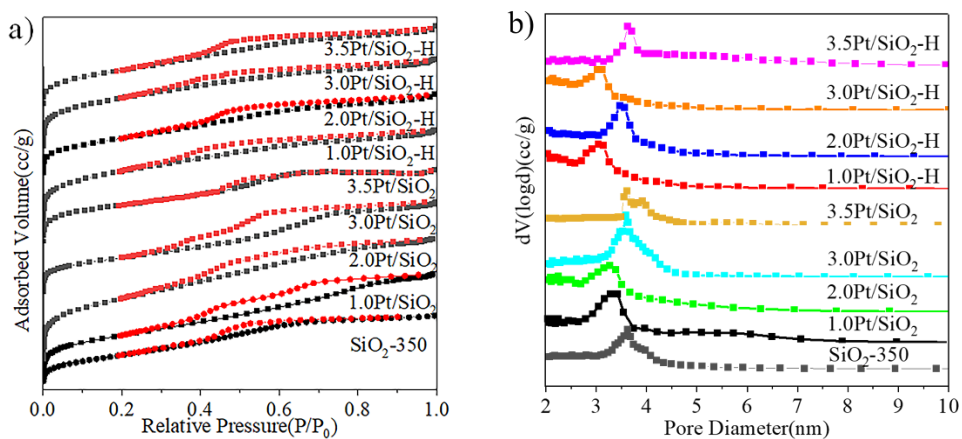

20  
21  
22  
23  
24

Figure S1. (a) N<sub>2</sub> adsorption-desorption isotherm curves and (b) pore size distributions of the as-synthesized catalysts, and their enlarged patterns in the pore diameter range of 2.5-5 nm are shown inset in (b).

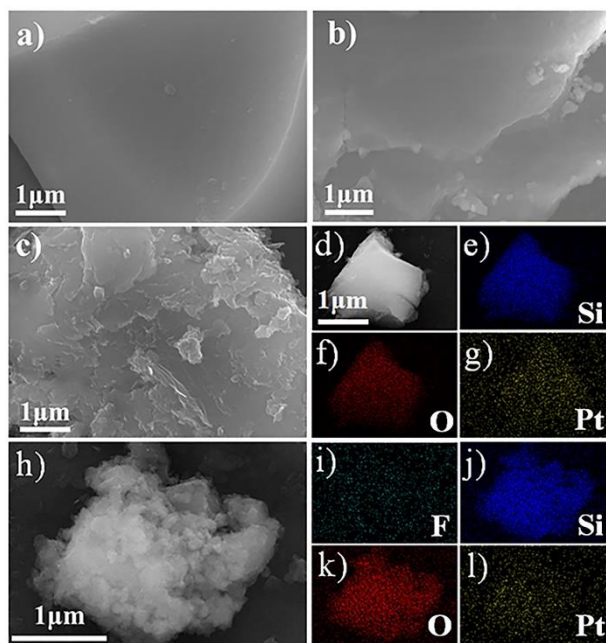

25  
26  
27  
28  
29  
30

Figure S2. Sem images of (a) SiO<sub>2</sub>-350, (b) 3.0Pt/SiO<sub>2</sub>, (c) 3.0Pt/SiO<sub>2</sub>-H, and EDS images of (d-g) Si, O, Pt elements for 3.0Pt/SiO<sub>2</sub>, and (h-l) Si, O, Pt, F elements of 3.0Pt/SiO<sub>2</sub>-H.

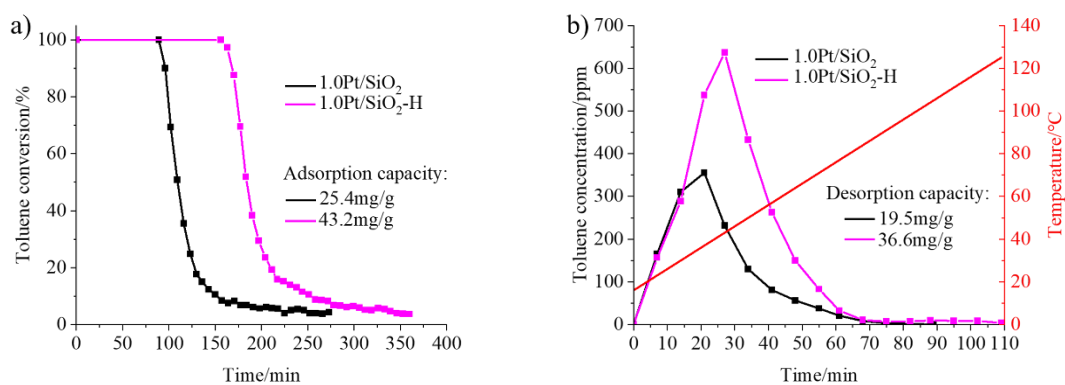

31

32 Figure S3. Toluene (a) adsorption and (b) desorption capacity of 1.0Pt/SiO<sub>2</sub>

33

and 1.0Pt/SiO<sub>2</sub>-H.

34

35

36

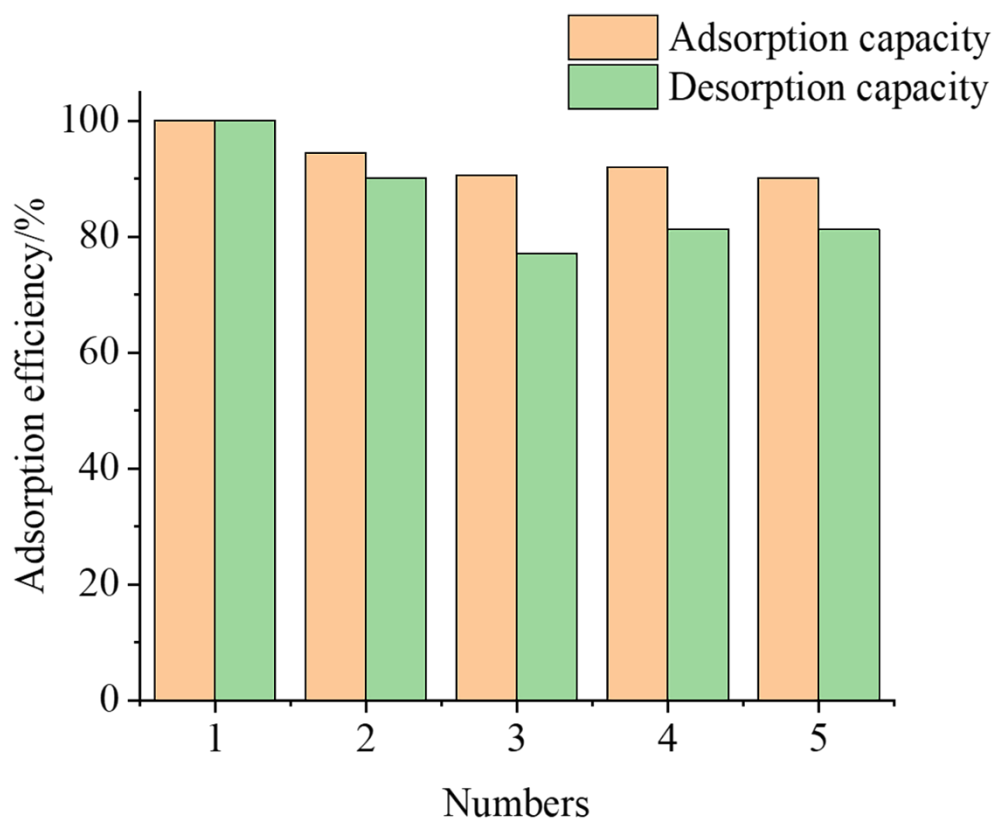

37

38 Figure S4. The cyclability of adsorption and desorption capacity for 3.0Pt/SiO<sub>2</sub>-H

39

40

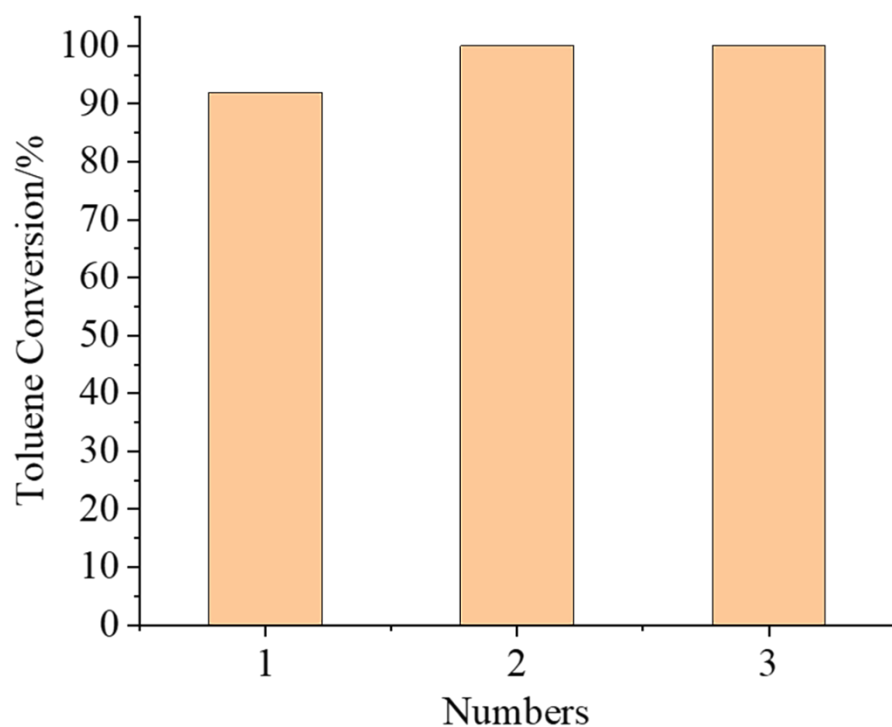

41

42 Figure S5. The cyclability of catalytic performance for 3.0Pt/SiO<sub>2</sub>-H at 130 °C

43

44 **Table S1**

45 Binding energy and area percentages of Pt in the samples analyzed by XPS spectra

| Catalyst                  | Binding energy/eV                 |                                    |                                    |                                   |                                    |                                    | Area/%             |                     |                     |
|---------------------------|-----------------------------------|------------------------------------|------------------------------------|-----------------------------------|------------------------------------|------------------------------------|--------------------|---------------------|---------------------|
|                           | Pt <sup>0</sup> 4f <sub>7/2</sub> | Pt <sup>2+</sup> 4f <sub>7/2</sub> | Pt <sup>4+</sup> 4f <sub>7/2</sub> | Pt <sup>0</sup> 4f <sub>5/2</sub> | Pt <sup>2+</sup> 4f <sub>5/2</sub> | Pt <sup>4+</sup> 4f <sub>5/2</sub> | Pt <sup>0</sup> 4f | Pt <sup>2+</sup> 4f | Pt <sup>4+</sup> 4f |
| 3.0Pt/SiO <sub>2</sub>    | 70.7                              | 71.4                               | 73.8                               | 74.0                              | 74.7                               | 77.1                               | 25.2               | 46.3                | 28.5                |
| 3.0Pt/SiO <sub>2</sub> -H | 70.0                              | 70.7                               | 73.1                               | 73.3                              | 74.0                               | 76.4                               | 23.1               | 50.8                | 26.1                |

46

47
